# Supplementary material for: Dynamic chest radiography: a state-of-the-art review
Source: PubMed Central journal article supplement (PMC10277270; doi:10.1186/s13244-023-01451-4), 2023-06-19

# **ELECTRONIC SUPPLEMENTARY MATERIAL**

## **Dynamic Chest Radiography: A State-of-the-Art Review**

### **Supplement 1**

#### **Summary of search terms utilised**

| <b>Search terms</b>                 |
|-------------------------------------|
| dynamic chest radiography           |
| dynamic chest x-ray                 |
| flat panel detector                 |
| DCR                                 |
| DXR                                 |
| FPD                                 |
| dynamic chest radiography           |
| dynamic thoracic imaging            |
| dynamic thoracic radiography        |
| functional chest radiography        |
| functional chest x-ray              |
| Image Processing, Computer-Assisted |
| dynamic                             |
| chest x-ray                         |
| thoracic                            |

|                |
|----------------|
| Thorax         |
| X-Rays         |
| x-ray          |
| phrenicography |

## Supplement 2

### Dynamic radiography system equipment and image processing

Dynamic radiography system equipment (Konica Minolta, Inc.)

- CMP200DR 50kW generator (CPI Inc.)
- AeroDR HD 17x17 flat panel detector (Konica Minolta, Inc.)
- Varian Rad-60 Sapphire X-ray tube and Optica 60 collimator (Varian Medical Systems Plc.)

Exposure conditions (for both posteroanterior and lateral image series)

- Source to image distance: 200cm
- Focal distance: 180cm
- Tube voltage: 100kV
- Tube current: 80mA\*
- Exposure duration of pulsed X-ray: 4ms
- Image capture rate: 6 or 15fps
- Pixel size: 400 $\mu$ m x 400 $\mu$ m
- Matrix size: 1062 x 1062 pixels

- Maximum image area: 42.5cm x 42.5cm
- Processing image density: 16bit
- Tube filter: 1.0mm Al + 0.1mm Cu

*\* can be increased to 160mA for lateral images*

DCR image analysis workstation: Dell Precision 3620, Intel i7-6700 processor, 16GB RAM, 2TB HDD, Microsoft Windows 10 Pro.

Software: proprietary DCR image analysis package (Konica Minolta, Inc.).

Image format: DICOM

Image processing: automated border detection algorithms define lung area and apex/diaphragm midpoint position. Change in lung area or diaphragm / apex-diaphragm position over time are plotted graphically by software and the points of maximum inspiration/expiration calculated automatically. Position data can be exported for further analysis/processing.

### Supplement 3

### PRISMA flowchart of study inclusion

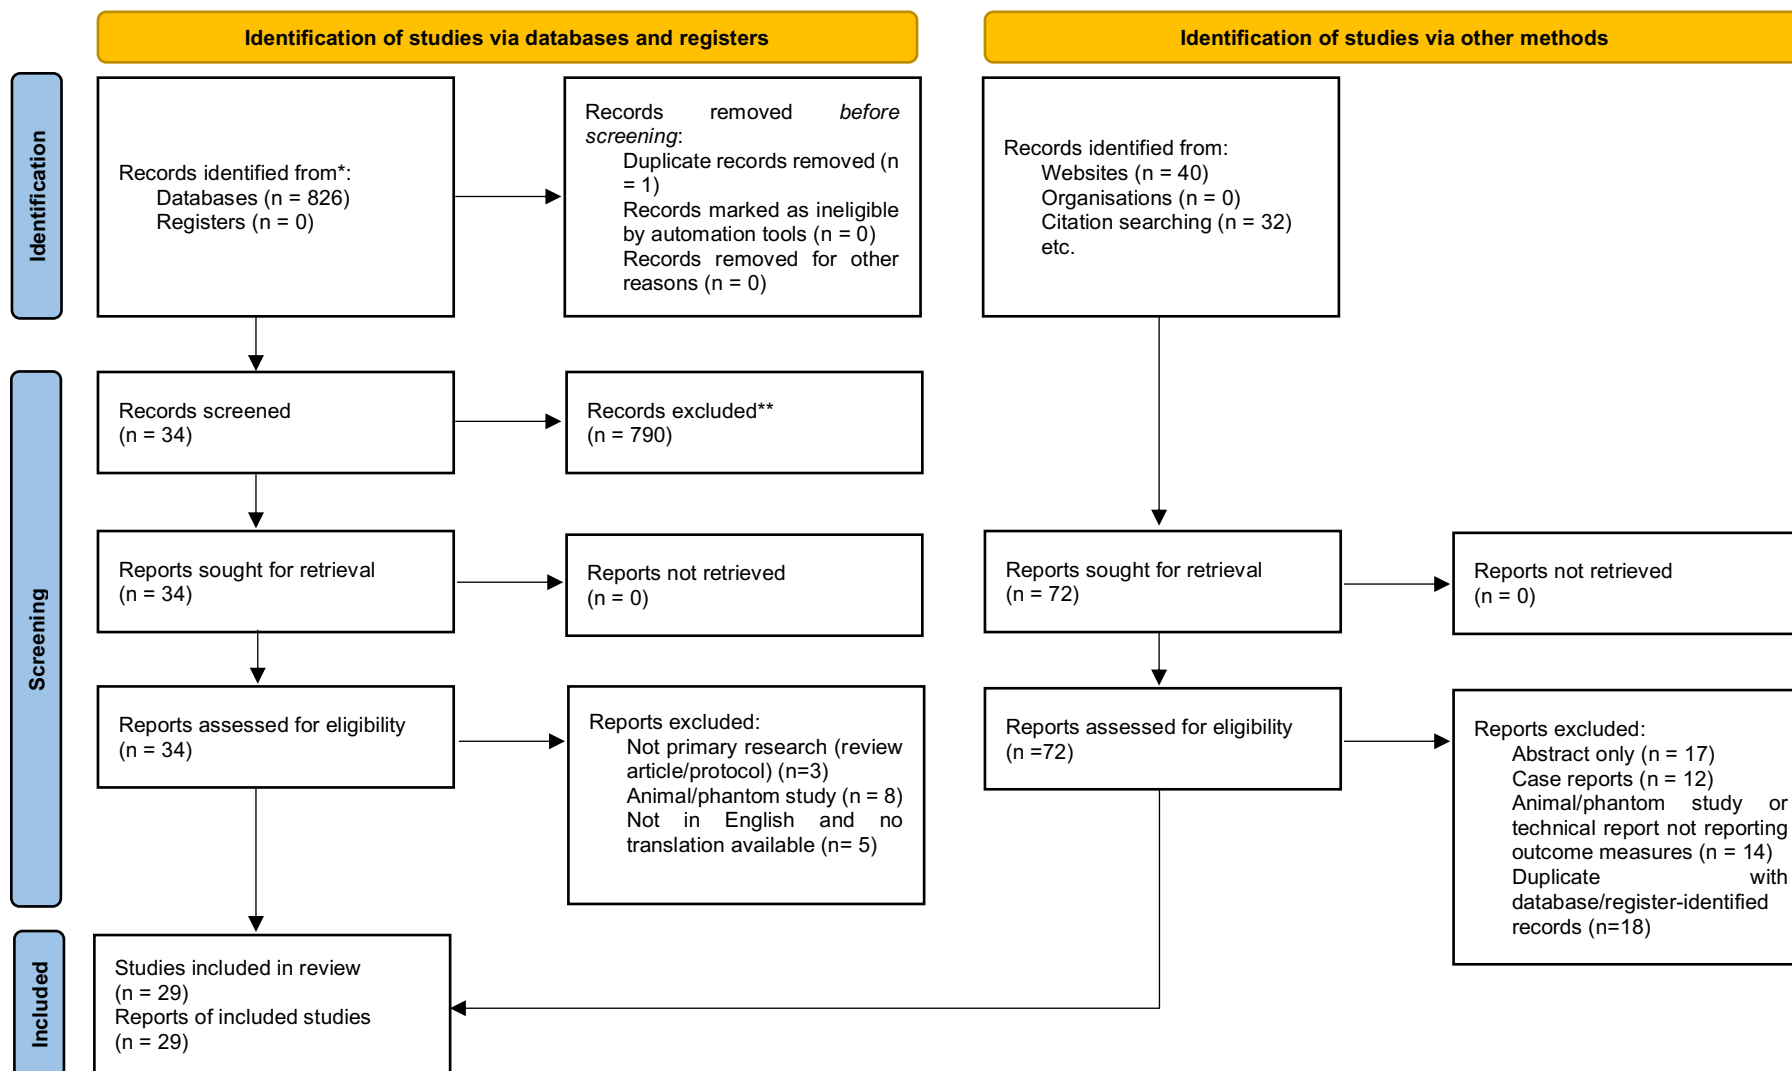

Supplement: 13244_2023_1451_MOESM1_ESM.pdf [file 13244_2023_1451_MOESM1_ESM.pdf]
